# Supplementary material
Source: publisher figshare collection journal article supplement (https://karger.figshare.com/ndownloader/files/18056567)
Supplement: Supplementary file 1 [file 18056567]

**ACKNOWLEDGEMENTS**

The authors wish to thank all the participants that took time and effort to complete two assessments, inquiring many details about their lives and problems. We also want to thanks all employees of the intake team and administration-department of Jellinek Utrecht, the interviewers of the Arkin call center for their assistance and support on research logistics and participant inclusion. Also many thanks to Hans Kronemeijer, Wilma van Gelderen (both Arkin), Laura deFuentes Merillas, Peter Greeven (both Novadic-Kentron), Gerard Schippers, The Broekman (bureau Beta), for support and advice. Special thanks to Aldrin Lacle and Bruno Stulen of the patient council of Jellinek for their valuable advice on question wording and inclusion support for this research project.

**STATEMENT OF ETHICS**

An exemption for medical ethical approval was granted by the medical ethical committee of the Amsterdam University Medical Center, due to the non-medical end non-invasive character of the study (reference number W16_243#16.284).

Consent for obtaining data was orally obtained by research assistants who contacted patients by telephone, prior to assessment. Consenting patients received a link to a digital version of the MATE-Q. Patients who were not reached by telephone, received the link for the MATE-Q (and information about the study) as well, and completing both the intake interview and the MATE-Q was conserved as consent for participation.

**DISCLOSURE STATEMENT**

S.O.works for Mark Bench. Mark Bench is hired regularly for consultation and subcontracting by the holding that contains the substance abuse treatment center that participated in this study.

M.S works for Mark Bench. Mark Bench is hired regularly for consultation and subcontracting by the holding that contains the substance abuse treatment center that participated in this study. M.S started working for the Dutch Addiction Association after Mark Bench commissioned this project.

At the time of the study, G.W., W.W., J.D., I.V. and A.G. all worked for the holding which contains the substance abuse treatment center that participated in this study.

**FUNDING**

This study was funded by Resultaten Scoren, a Dutch foundation with aims at quality improvement for the substance abuse treatment sector. Members are 11 substance abuse treatment centers. Resultaten Scoren recently merged into the Dutch Addiction Association (DAA).
